# Supplementary material for: Genome-Wide Analysis of SREBP1 Activity around the Clock Reveals Its Combined Dependency on Nutrient and Circadian Signals
Source: PubMed Central journal article supplement (PMC3945117; doi:10.1371/journal.pgen.1004155), 2014-03-06

**Supplementary Figure S2. Temporal relationship of SREBP1 and Pol II profiles and mRNA accumulation of SREBP1 putative target genes.**

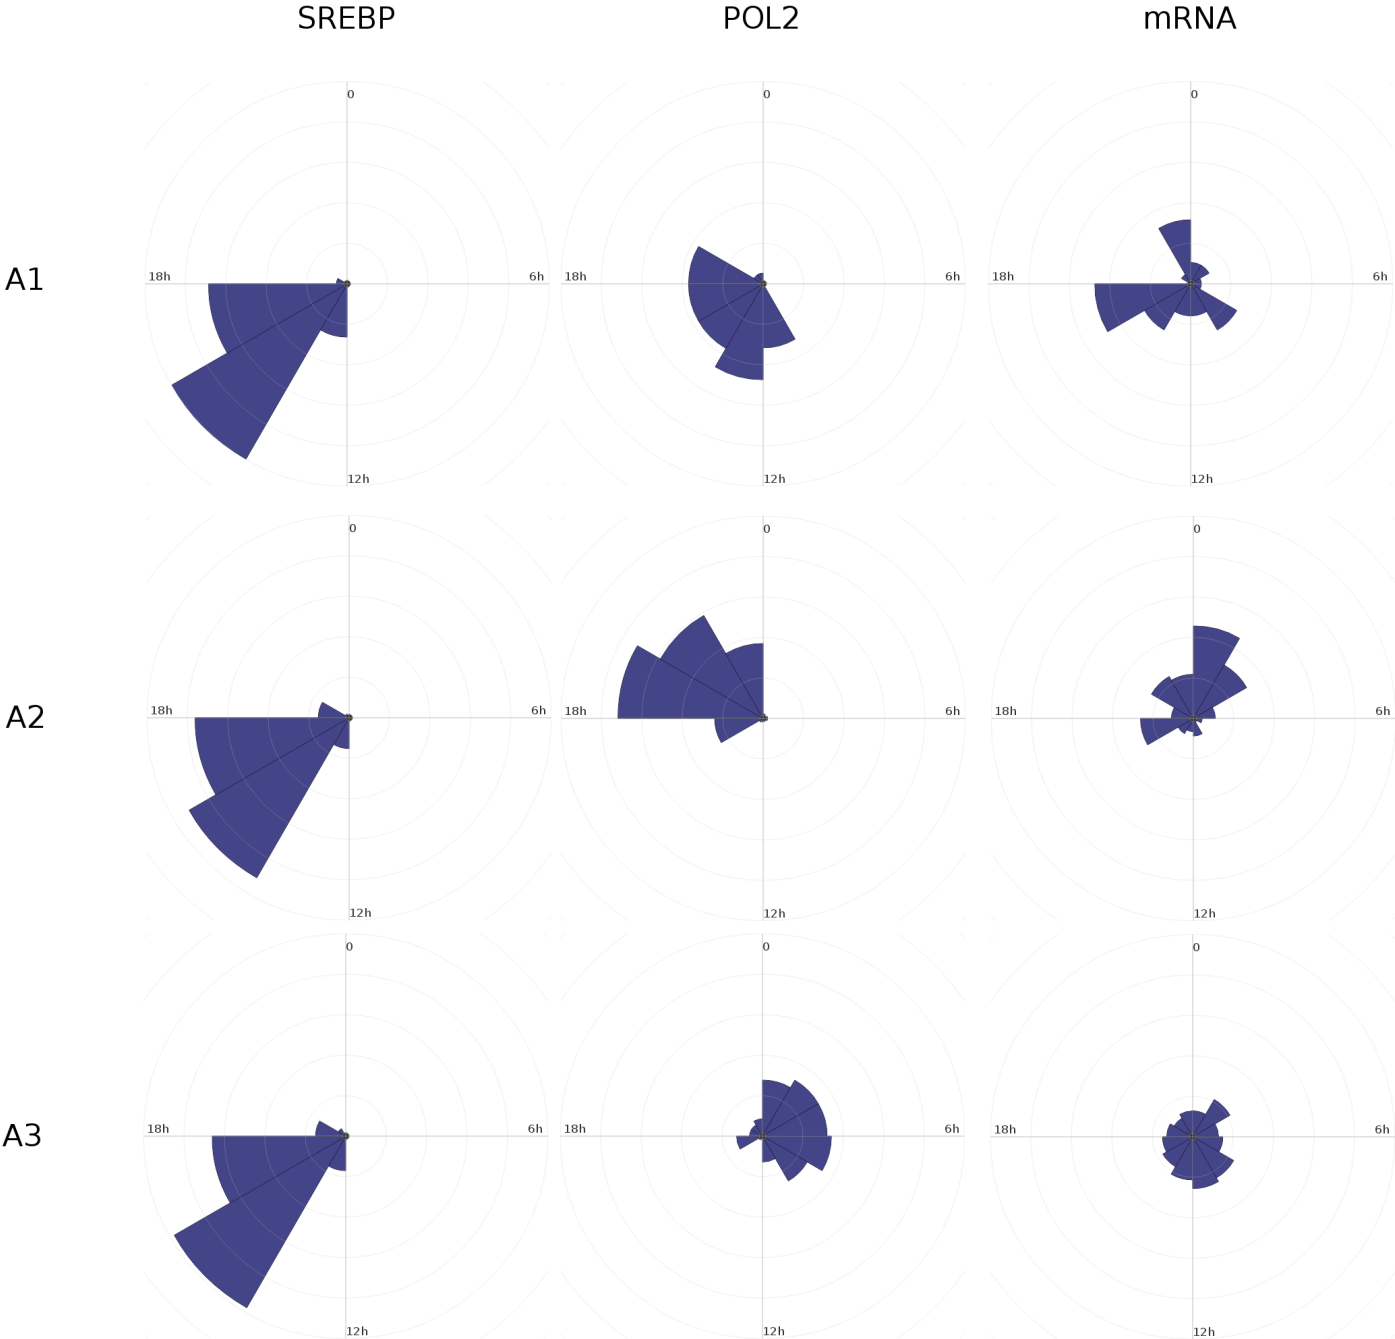

Supplement: pgen.1004155.s002.pdf [file pgen.1004155.s002.pdf]
