# Supplementary material for: Genome-Wide Analysis of SREBP1 Activity around the Clock Reveals Its Combined Dependency on Nutrient and Circadian Signals
Source: PubMed Central journal article supplement (PMC3945117; doi:10.1371/journal.pgen.1004155), 2014-03-06

### Supplementary Figure S3: metabolic parameter in *Bmal1*<sup>-/-</sup> mice

**A**

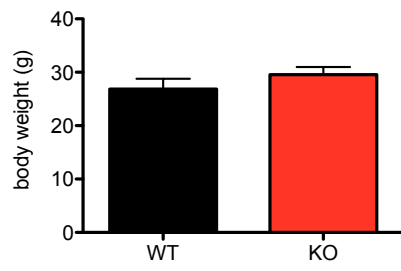

**B**

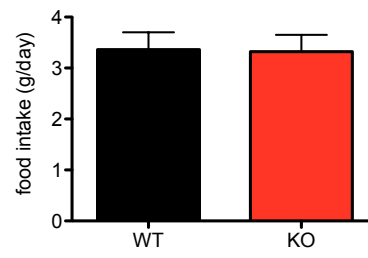

**C**

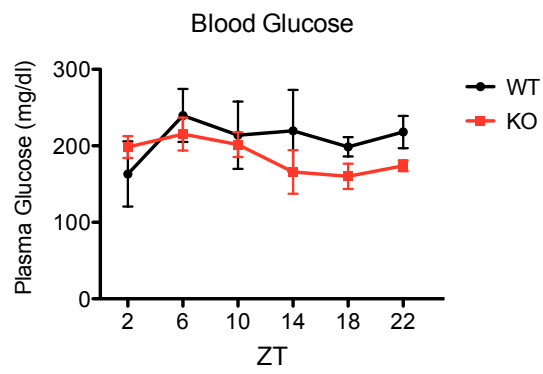

Supplement: pgen.1004155.s003.pdf [file pgen.1004155.s003.pdf]
