# Supplementary material for: Genome-Wide Analysis of SREBP1 Activity around the Clock Reveals Its Combined Dependency on Nutrient and Circadian Signals
Source: PubMed Central journal article supplement (PMC3945117; doi:10.1371/journal.pgen.1004155), 2014-03-06

**Supplementary Figure S4. Phase distribution of SREBP1 target genes in *Bmal1*<sup>-/-</sup> mice**

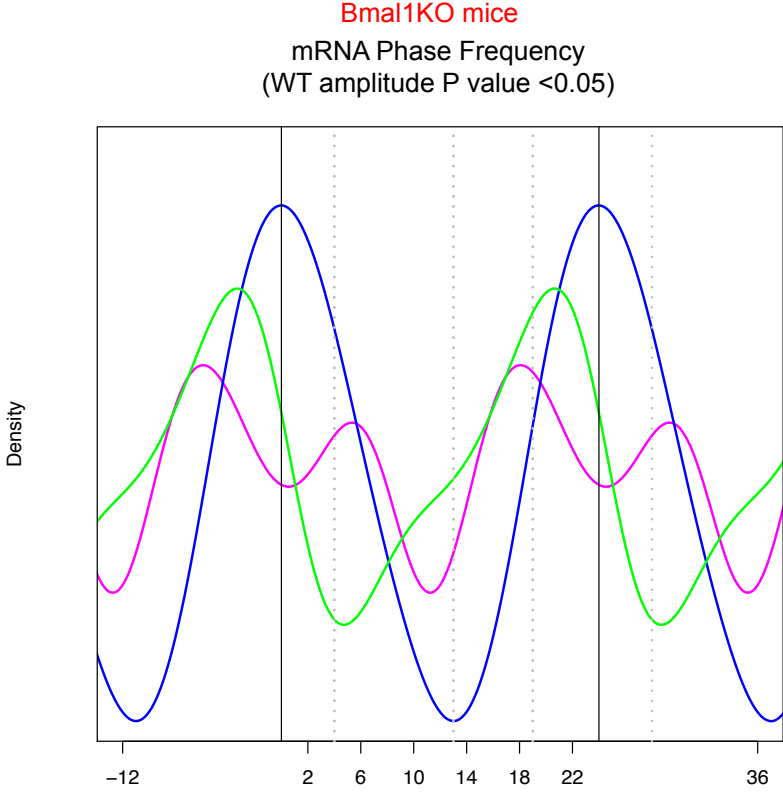

Supplement: pgen.1004155.s004.pdf [file pgen.1004155.s004.pdf]
