# Supplementary material for: Genome-Wide Analysis of SREBP1 Activity around the Clock Reveals Its Combined Dependency on Nutrient and Circadian Signals
Source: PubMed Central journal article supplement (PMC3945117; doi:10.1371/journal.pgen.1004155), 2014-03-06
Supplement: pgen.1004155.s005.pdf [file pgen.1004155.s005.pdf]

**Supplementary Table S1. Sequencing data for the ChIP-seq of SREBP1: number of sequenced and non-redundant tags at each time point**

| atLeastOneAlign  | failed2Align       | suppressedDue2m5 | reportedAlign | usedReads |
|------------------|--------------------|------------------|---------------|-----------|
| 4073534 (10.91%) | 3032468<br>(8.12%) | 32916444         | 23781575      | 22217240  |
| 4243058 (10.31%) | 3273893<br>(7.96%) | 36612196         | 27304944      | 25504542  |
| 4742813 (11.49%) | 3389202<br>(8.21%) | 36150820         | 27744795      | 25937659  |
| 4336651 (11.70%) | 3042858<br>(8.21%) | 32334405         | 26474388      | 24739003  |
| 4250645 (11.08%) | 3039164<br>(7.92%) | 33758169         | 29346073      | 27474051  |
| 4245893 (11.61%) | 2892161<br>(7.91%) | 32015750         | 24664390      | 23058942  |
