# Supplementary material for: Genome-Wide Analysis of SREBP1 Activity around the Clock Reveals Its Combined Dependency on Nutrient and Circadian Signals
Source: PubMed Central journal article supplement (PMC3945117; doi:10.1371/journal.pgen.1004155), 2014-03-06
Supplement: pgen.1004155.s011.pdf [file pgen.1004155.s011.pdf]

**Supplementary Table S7. Primer sequences used in qPCR analysis of gene expression.**

| <b>Primer Name</b> | <b>F primer (5'- 3')</b>   | <b>R primer (5'- 3')</b>  |
|--------------------|----------------------------|---------------------------|
| Aacs               | CCAGCCTCATCCTGGAGAC        | GGATGTCCCGGTACAGGTC       |
| Clcn6              | CTTCACCATTTACCGTCTCCC      | AATTCATTTGTCAGGTTGTGCC    |
| Clock1             | AGCAGCCAGCTCAGGCC          | TGGAGCAACCTAGATGTCTGTAAGA |
| Cry1               | CTGGCGTGGAAGTCATCGT        | CTGTCCGCCATTGAGTTCTATG    |
| Cry2               | GGTTCCTACTGCAATCTCTGG      | GTCATATTCAAAGGTCAAACGGG   |
| Dbp                | AAGAACCGGCCAGCTGTCT        | GGCTGAGGGCAGAGTTGC        |
| Insig1             | GATTACCATCGCCTTCCTAGC      | CGTCCTATGTTTCCCCTGTG      |
| Klf10              | TCTAGTGTCTCAGTGCTCCC       | TTAGTTCCATTTTCCCCTCCG     |
| Obfc2a             | GTGCCAAATTTCAAGTGGCC       | CCAGTCTGATCACCATTTCCTCC   |
| Rev-erba           | GACCTTTCTCAGCAGCACC        | CATCACTGTCTGGTCCTTCAC     |
| Slc25a25           | AAGGCTACATCCCCAACATG       | AGATAGTACCACAGGCCAGG      |
| Srebp1c            | ATGGATTGCACATTTGAAGACATGCT | CCTGTGTCCCCTGTCTCAC       |
| Rps9               | GACCAGGAGCTAAAGTTGATTGGA   | TCTTGGCCAGGGTAAACTTGA     |
| 36B4               | AGATGCAGCAGATCCGCAT        | GTTCTTGCCCATCAGCACC       |
