# Supplementary material for: Genome-Wide Analysis of SREBP1 Activity around the Clock Reveals Its Combined Dependency on Nutrient and Circadian Signals
Source: PubMed Central journal article supplement (PMC3945117; doi:10.1371/journal.pgen.1004155), 2014-03-06
Supplement: pgen.1004155.s012.pdf [file pgen.1004155.s012.pdf]

**Table S8. Primer sequences used in ChIP-qPCR experiments.**

| <b>Primer name</b> | <b>F primer (5'- 3')</b>  | <b>R primer (5'- 3')</b> |
|--------------------|---------------------------|--------------------------|
| Aacs SRE           | CGTGCCTATGCTCAGAATCC      | ACCAGCCCAAGGAACTTCT      |
| Anks4b SRE         | GTCCAGGATTGCAGGTCTTC      | GGTTAATCAGTGACGGGGAGT    |
| Cln6 SRE           | CCCTCTCGAGCTCTGGGT        | CAGCCAAGTACTGCGTCATG     |
| Fasn SRE           | GCGCAGCCCCGACGCTCATT      | CGGCGCTATTTAAACCGCGG     |
| Gnat1 SRE          | ACCCACGTCAAAGTCACTCA      | GGTTAGTGACTGTCCCTCCC     |
| Insig1 SRE         | TCAGCCCAGTCTTGTGACAG      | CTGTGTCTCCCAAGTGCAA      |
| Ldlr SRE           | GATTCGCAGCCGAGACAC        | CCTCACTCGGATCACAGACC     |
| Obfc2a SRE         | CTCAGGGAAGGTACGTGACAG     | GTTCCGCCAGTTGCTGCTT      |
| Slc25a25 SRE       | AGCTCTGGTGGAAAATGCAA      | GACACCTGCCCTACCCTAAG     |
| Srebf1 SRE2        | GTAGCCAATGGGTGCAAGG       | CACGTGACCAAAACCAGAGT     |
| Cyp7a1 TSS-1500    | CTCTGGCCTAGTGTCACTACTACCT | GCCAAGCGACCCTCTCA        |
| Cyp7a1 TSS-150     | GCTTATCGACTATTGCAGCTCTCT  | CTGGCCTTGAACCTAAGTCCATCT |
| Neg1               | CTATGGCTTCCTCGCTCTG       | TCACGGAAGGTCTGGAGTAG     |
| Neg2               | AGCAACTCCCCTCTCCAC        | CAAACCCCAAGTTGCTCTTA     |
